# Supplementary material for: Predicted septuple-atomic-layer Janus MSiGeN4 (M = Mo and W) monolayers with Rashba spin splitting and high electron carrier mobilities
Source: Royal Society of Chemistry journal article supplement (doi:10.1039/d0tc05649a), 2021-01-01
Supplement: d0tc05649a1.pdf [file d0tc05649a1.pdf]

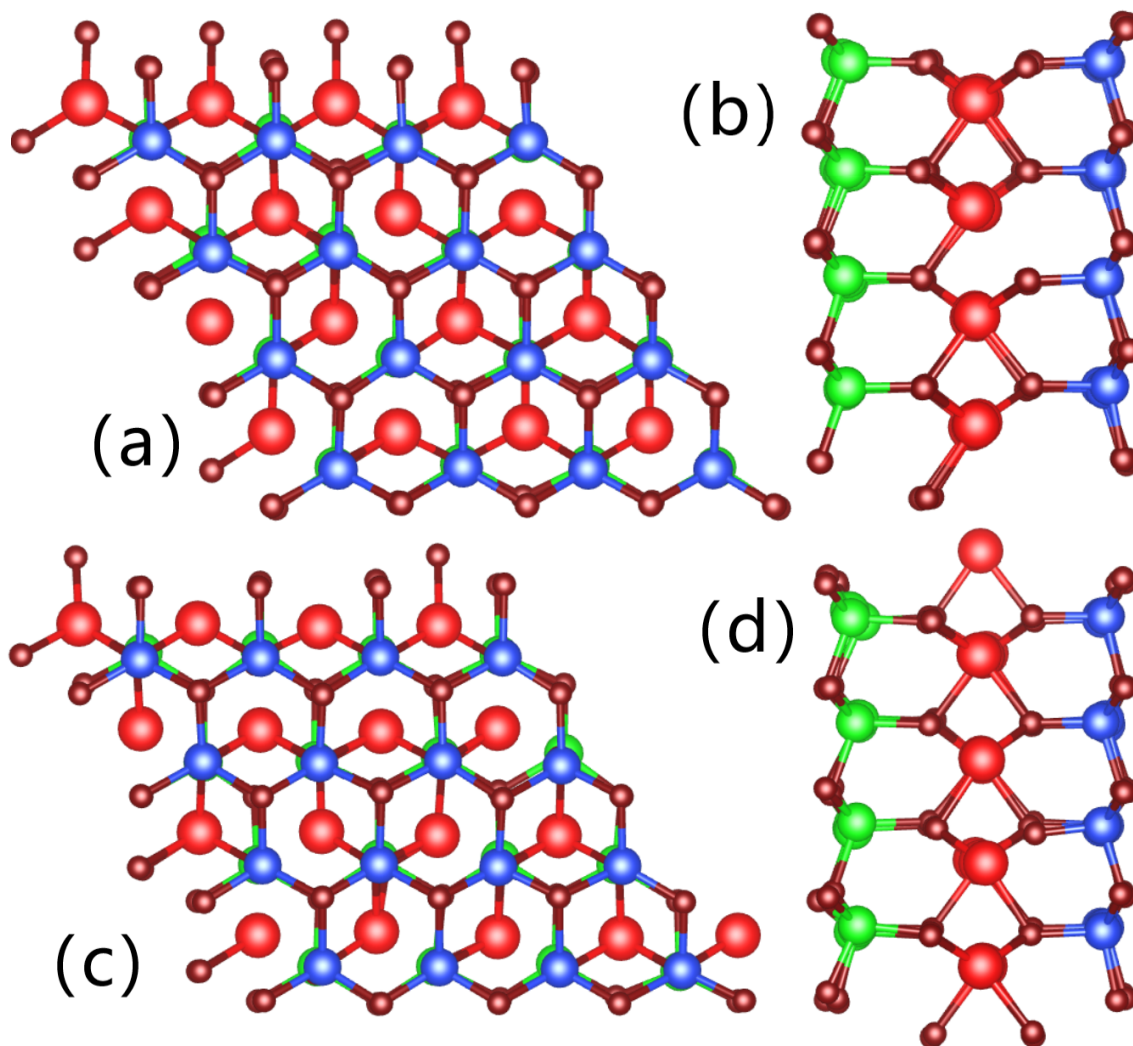

FIG. 1. (Color online) The crystal structures (a: Top views; b: Side views at 300 K and c: Top views; d: Side views at 600 K) of WSiGeN<sub>4</sub> after the simulation for 3 ps.

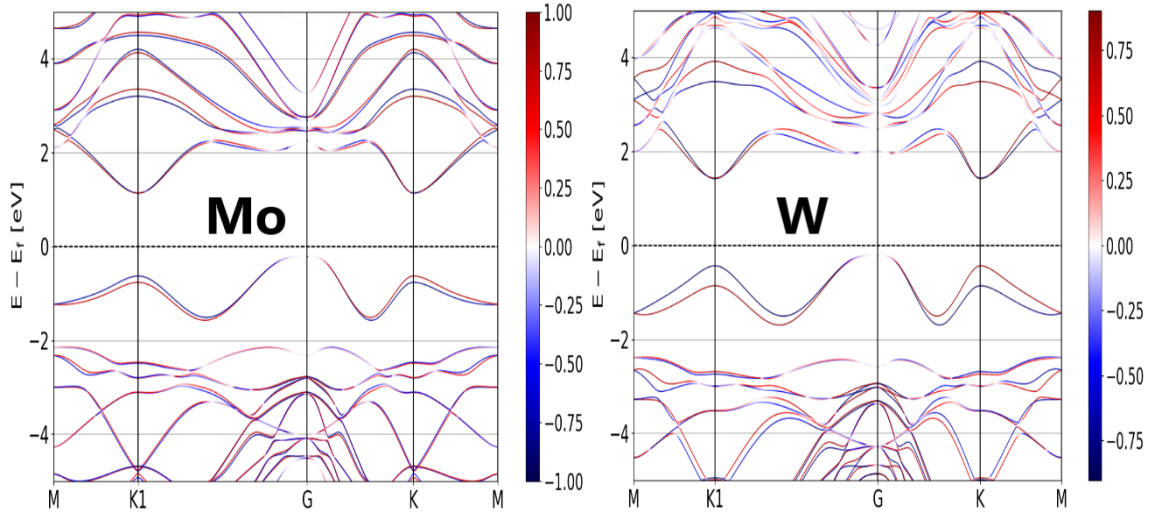

FIG. 2. (Color online) Band structures of monolayer  $\text{MSiGeN}_4$  ( $M=\text{Mo}$  and  $\text{W}$ ) monolayer in the presence of SOC along  $M(0, 0.5, 0)$ - $\text{K1}(-1/3, 2/3, 0)$ - $\text{G}(0, 0, 0)$ - $\text{K}(1/3, 1/3, 0)$ - $\text{M}(0, 0.5, 0)$  high-symmetry path. The red and blue colors indicate the spin-up and spin-down bands, respectively.

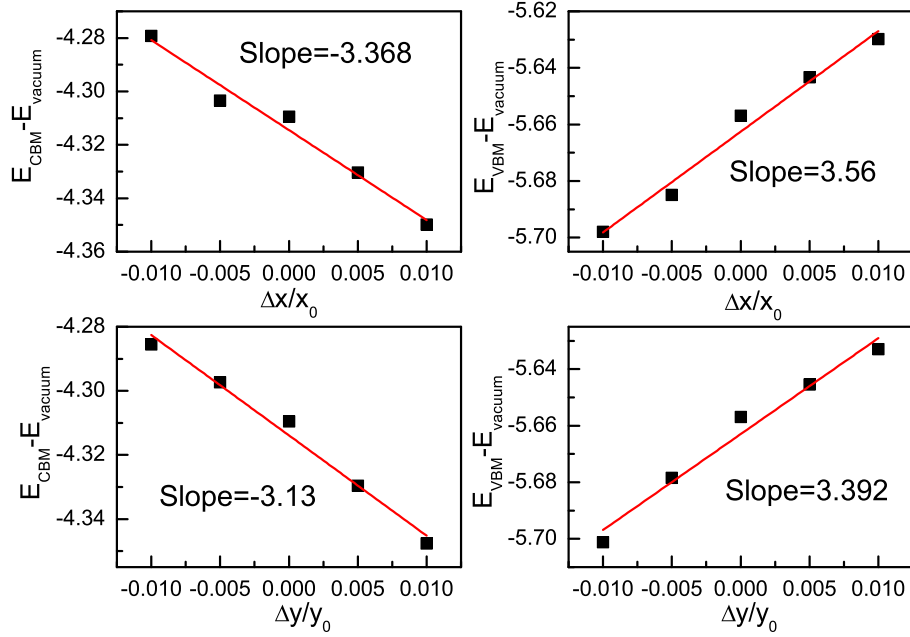

FIG. 3. (Color online) The band energies of the VBM and CBM of  $\text{MoSiGeN}_4$  monolayer with respect to the vacuum energy as a function of lattice dilation along both  $x$  and  $y$  directions using GGA+SOC. The red solid lines are linear fitting curves with fitted slopes as the DP.

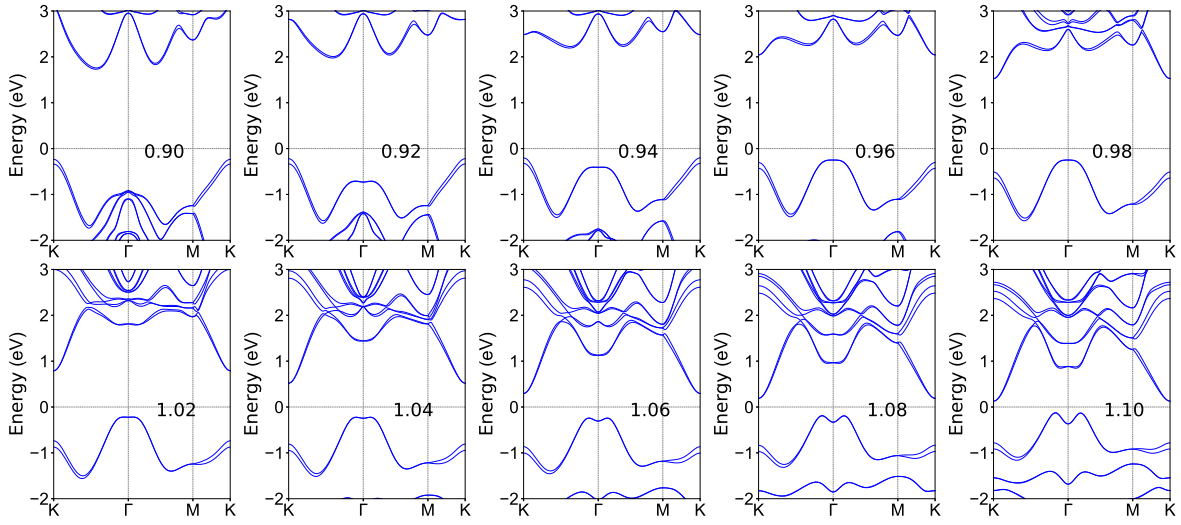

FIG. 4. (Color online) The energy band structures of MoSiGeN<sub>4</sub> monolayer using GGA+SOC with  $a/a_0$  changing from 0.90 to 1.10.

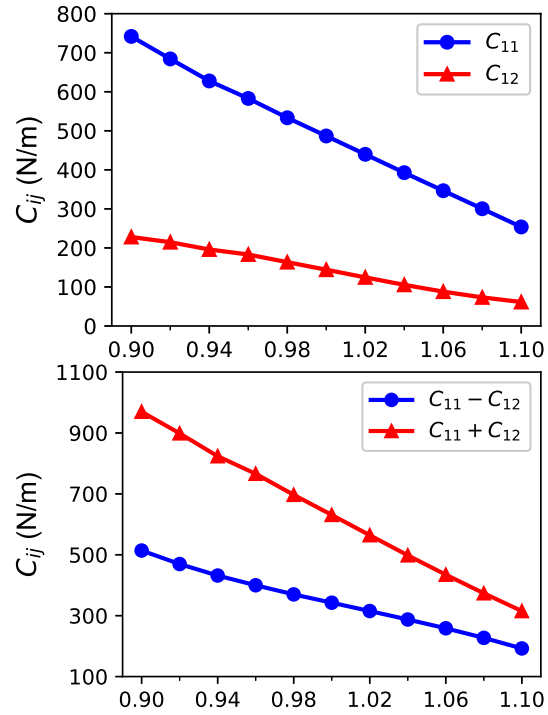

FIG. 5. (Color online) For monolayer MoSiGeN<sub>4</sub>, the elastic constants  $C_{ij}$  with the application of biaxial strain (0.90 to 1.10).

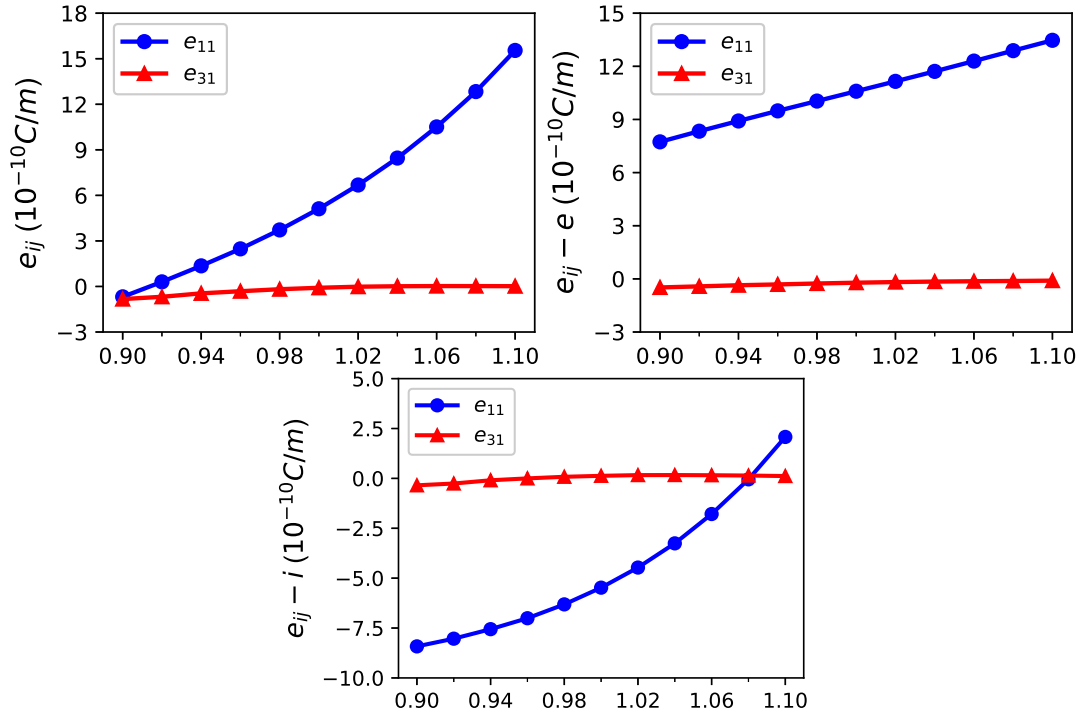

FIG. 6. (Color online) For monolayer MoSiGeN<sub>4</sub>, the piezoelectric stress coefficients  $e_{11}$  and  $e_{31}$  along with the ionic contribution and electronic contribution to  $e_{11}$  and  $e_{31}$  with the application of biaxial strain (0.90 to 1.10).

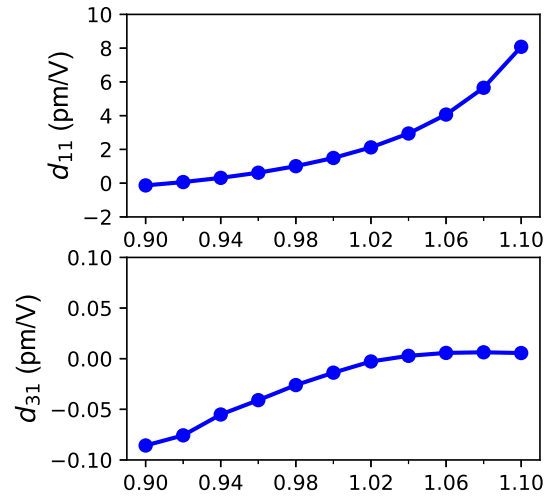

FIG. 7. (Color online) For monolayer MoSiGeN<sub>4</sub>, the piezoelectric strain coefficients  $d_{11}$  and  $d_{31}$  with the application of biaxial strain (0.90 to 1.10).
